# Supplementary material for: Novel 2-alkyl-1-ethylpyridinium ionic liquids: synthesis, dissociation energies and volatility
Source: Royal Society of Chemistry journal article supplement (doi:10.1039/c4cp05191b), 2014-12-02
Supplement: c4cp05191b1.pdf [file c4cp05191b1.pdf]

## Supporting Information

### Novel 2-Alkyl-1-Ethylpyridinium Ionic Liquids: Synthesis, Dissociation Energies and Volatility

Miguel Vilas <sup>a</sup>, Marisa A. A. Rocha <sup>b,1</sup>, Ana M. Fernandes <sup>c</sup>, Emilia Tojo <sup>\*,a</sup>, Luís M. N. B. F.  
Santos <sup>\*,b</sup>

a Department of Organic Chemistry, University of Vigo, Faculty of Chemistry,  
Marcosende, Vigo, Spain

b CIQ, Departamento de Química e Bioquímica, Faculdade de Ciências da  
Universidade do Porto, Porto, Portugal

c QOPNA Unit, Departamento de Química, Universidade de Aveiro, 3810-193 Aveiro,  
Portugal

<sup>1</sup> Current address: Department of Chemical Engineering and Chemistry, Eindhoven  
University of Technology, Eindhoven, The Netherlands.

## Supporting Information

### Characterization of the 1-alkyl-2-ethylpyridinium ionic liquids ( $^{13}\text{C}$ NMR spectra)

#### 1,2-Diethylpyridinium bromide (9).

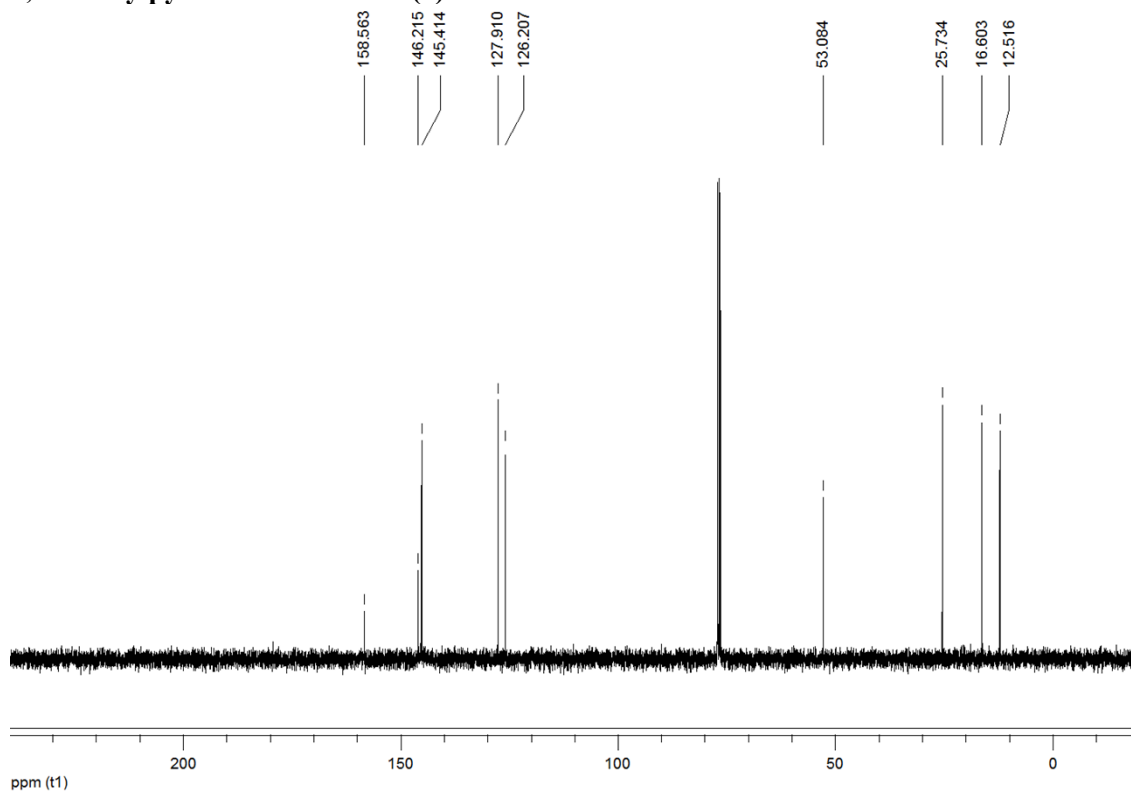

**1-Ethyl-2-propylpyridinium bromide (10).**

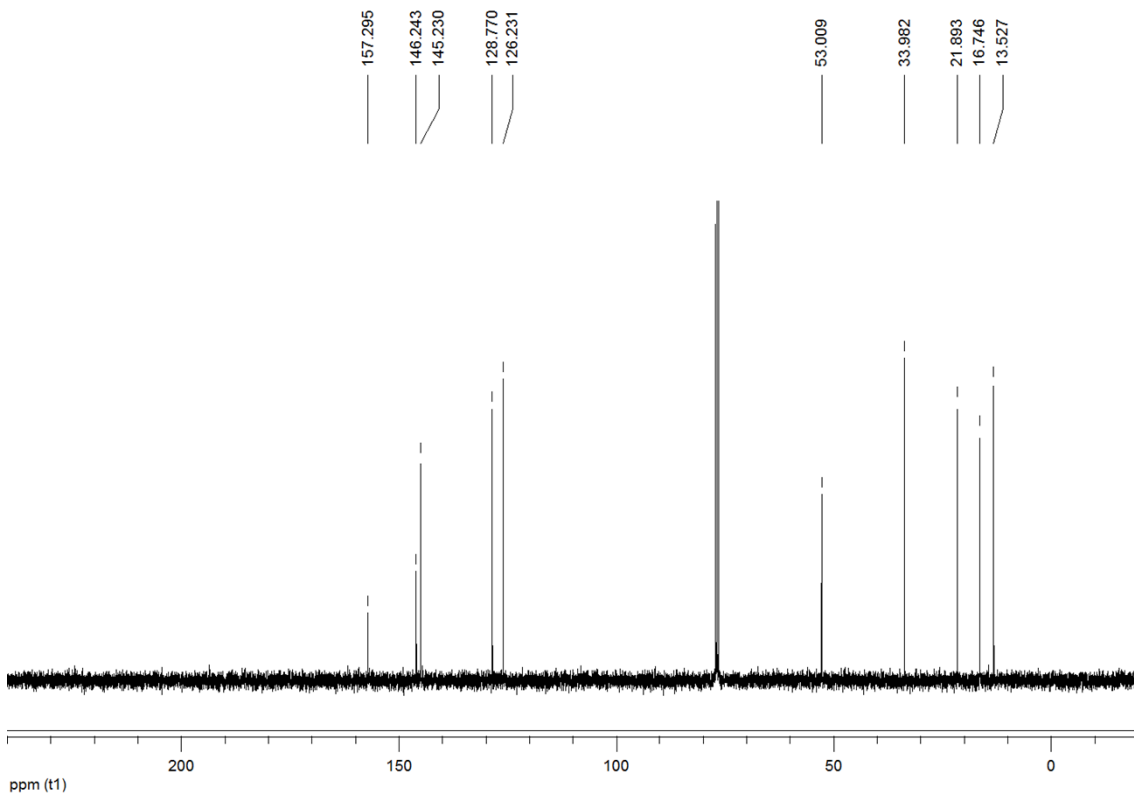

**1,2-Diethylpyridinium bromide (11).**

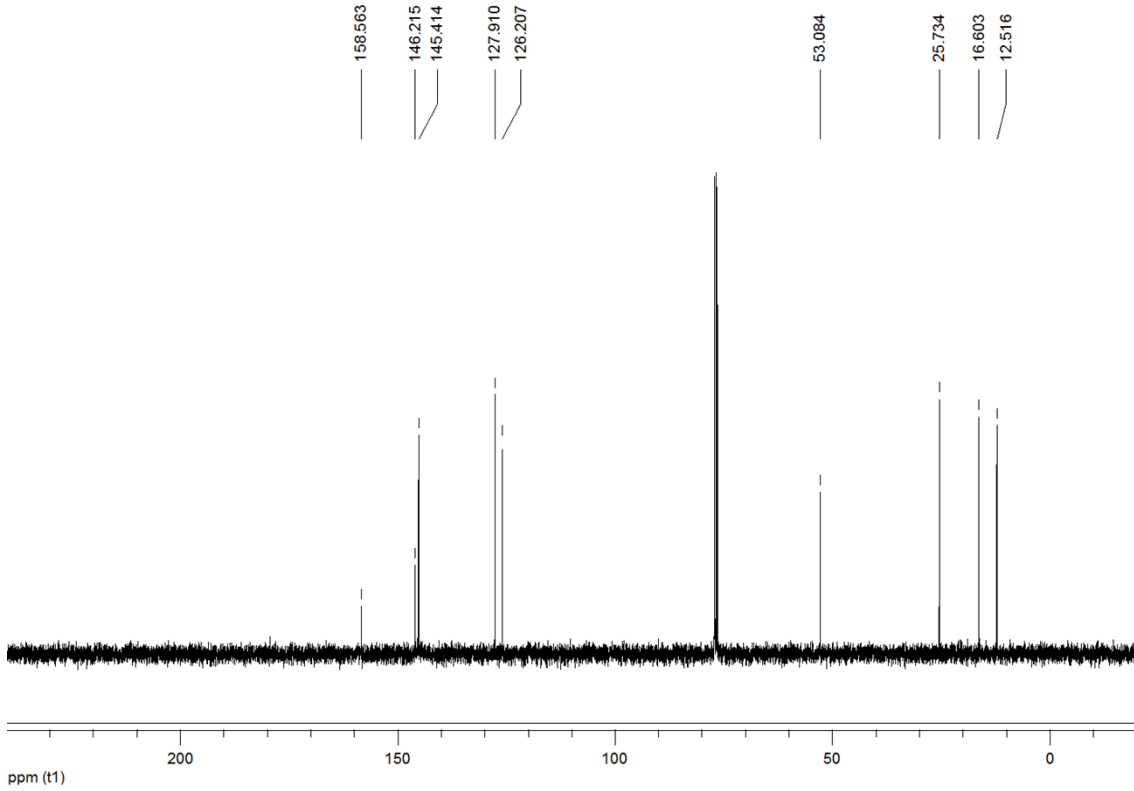

**1-Ethyl-2-propylpyridinium bromide (12).**

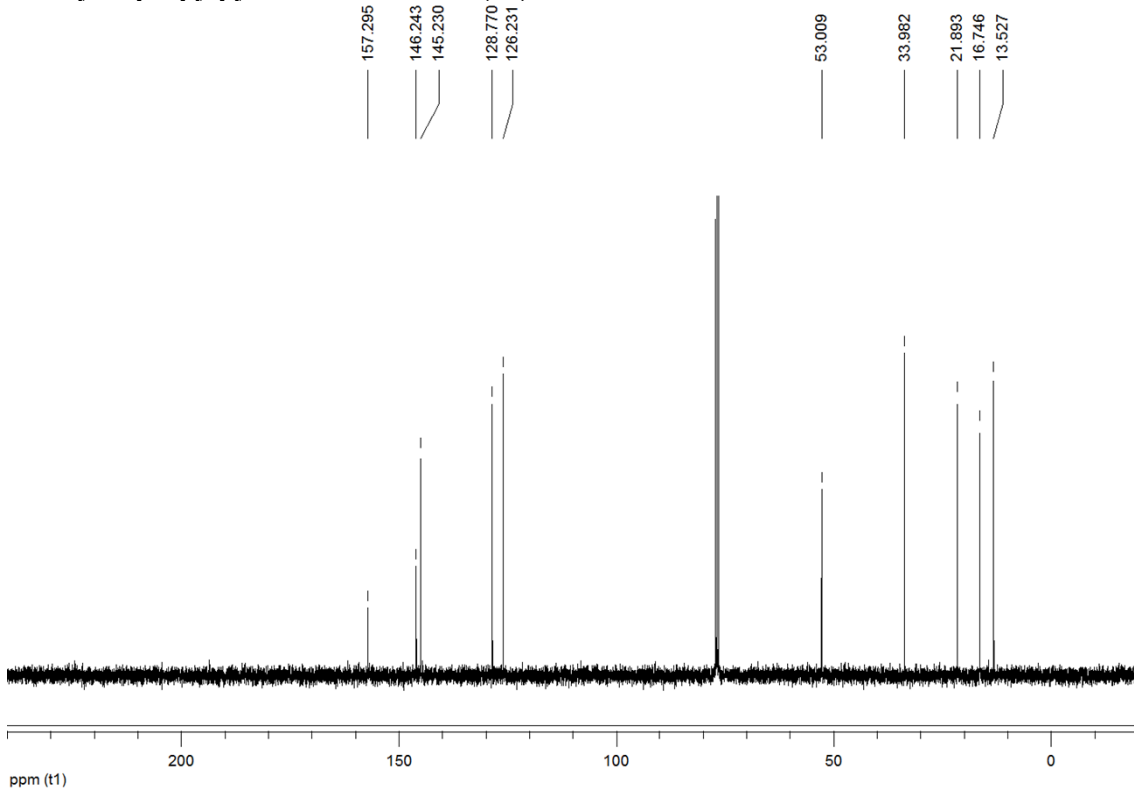

**2-Butyl-1-ethylpyridinium bromide (13).**

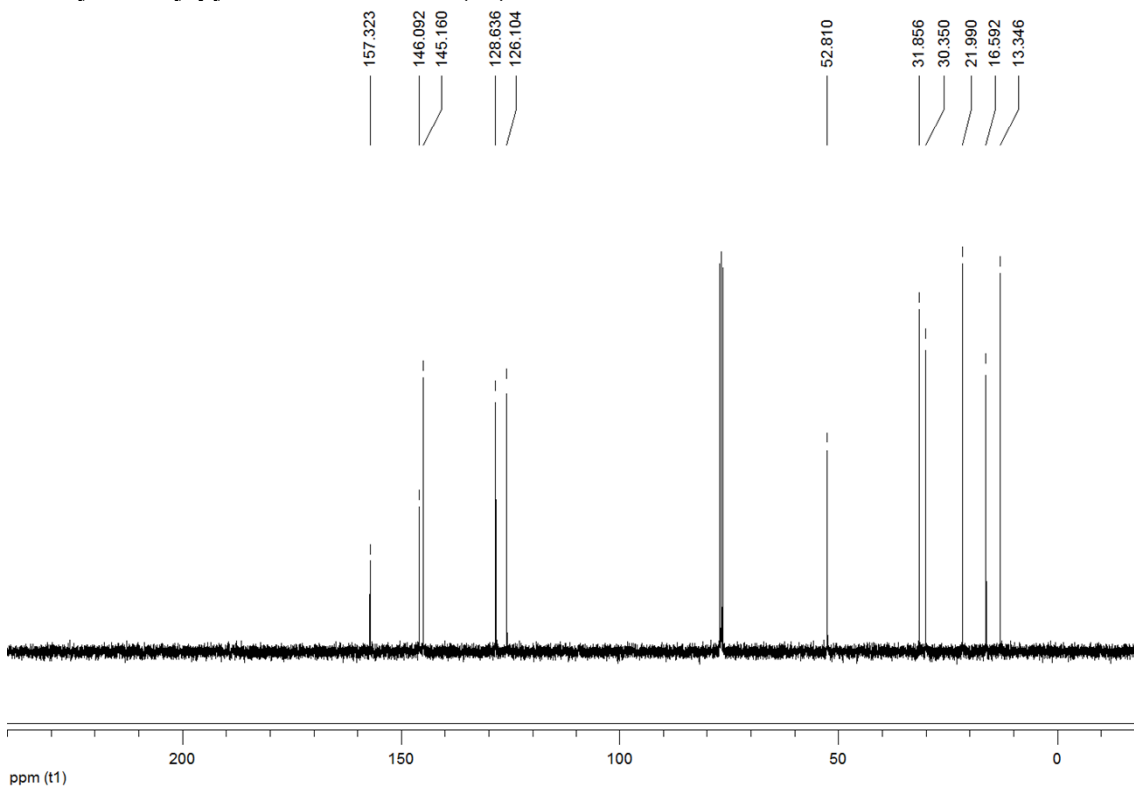

**1-Ethyl-2-pentylpyridinium bromide (14).**

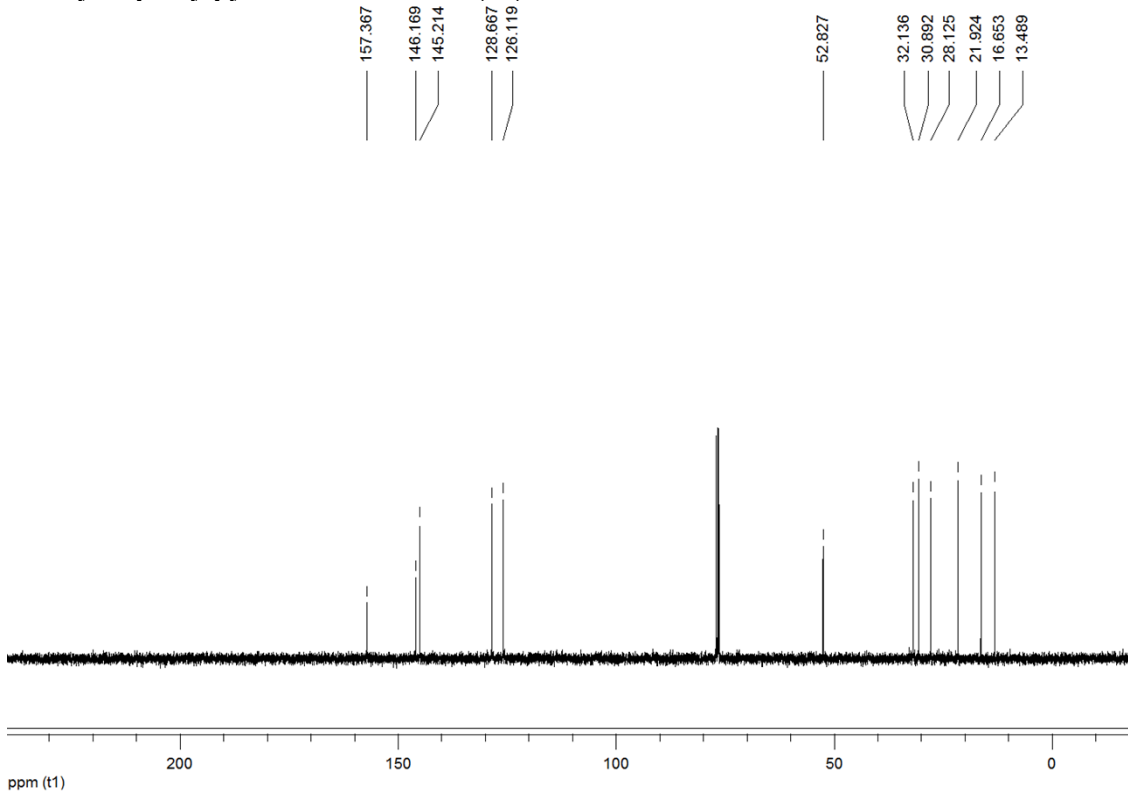

**1-Ethyl-2-hexylpyridinium bromide (15).**

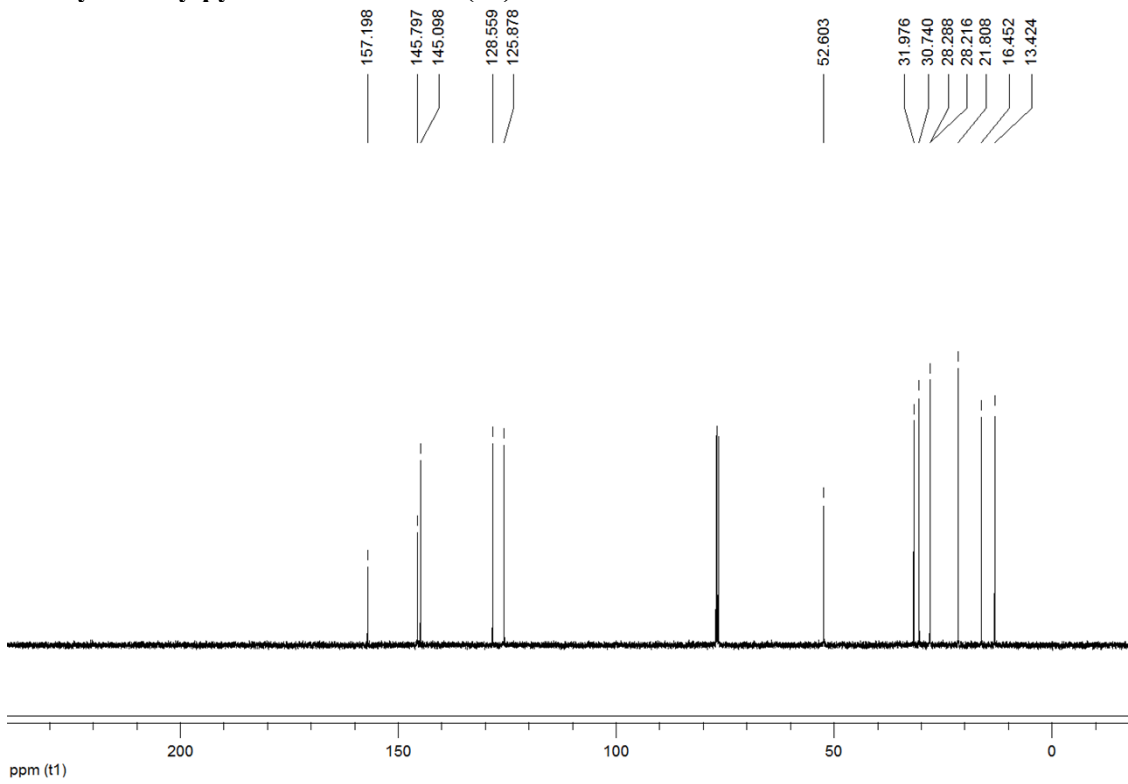

**1-Ethyl-2-heptylpyridinium bromide (16).**

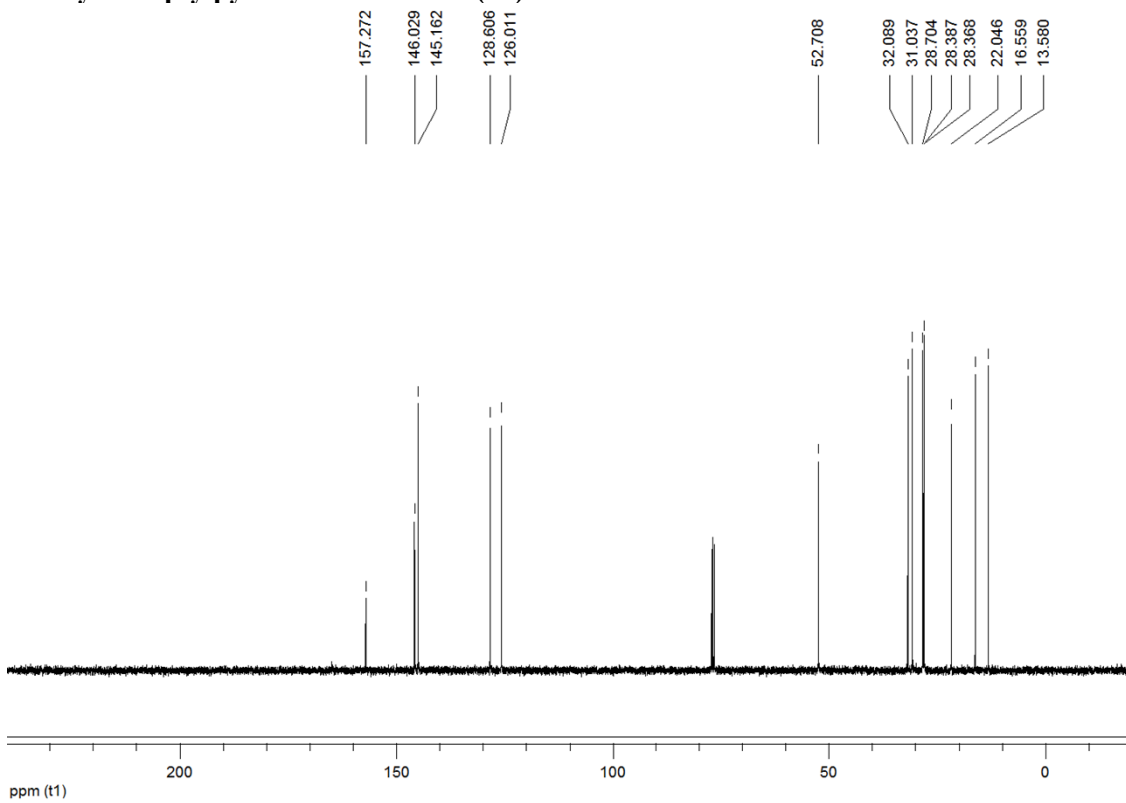

**1-Ethyl-2-octylpyridinium bromide (17).**

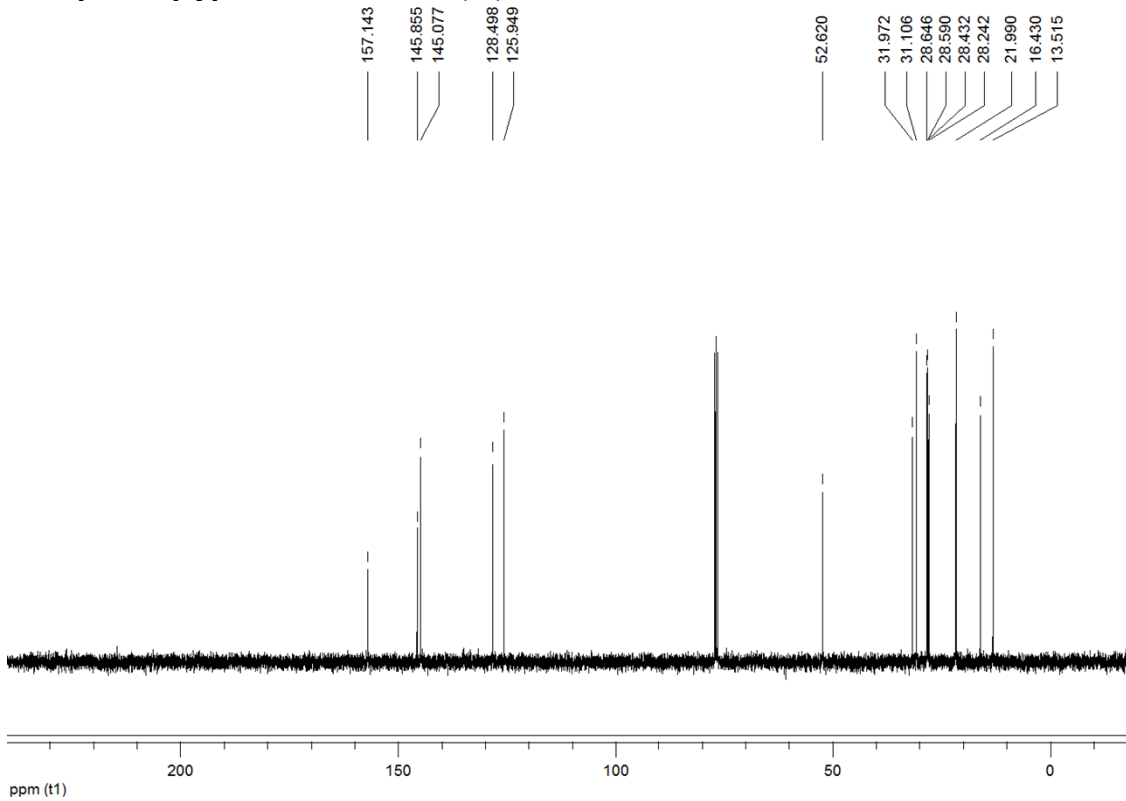

### 1-Ethyl-2-nonylpyridinium bromide (18).

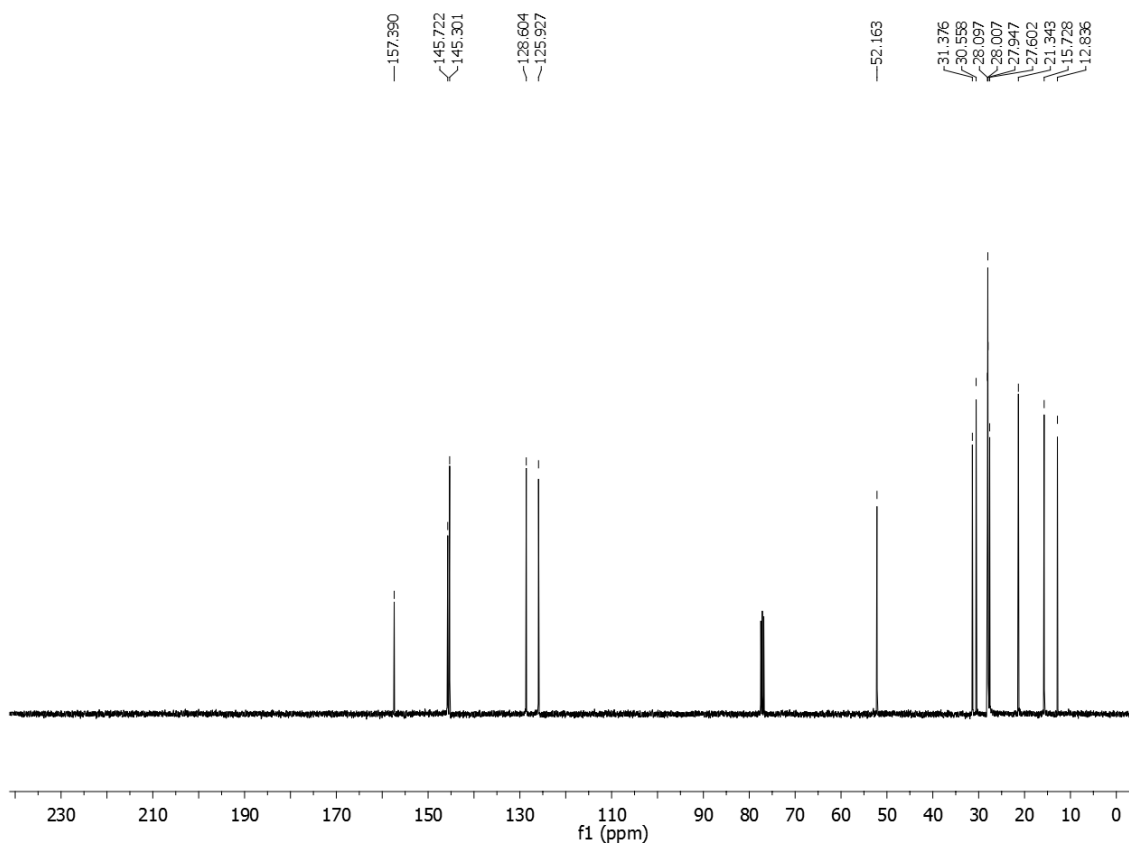

### 2-Decyl-1-Ethylpyridinium bromide (19).

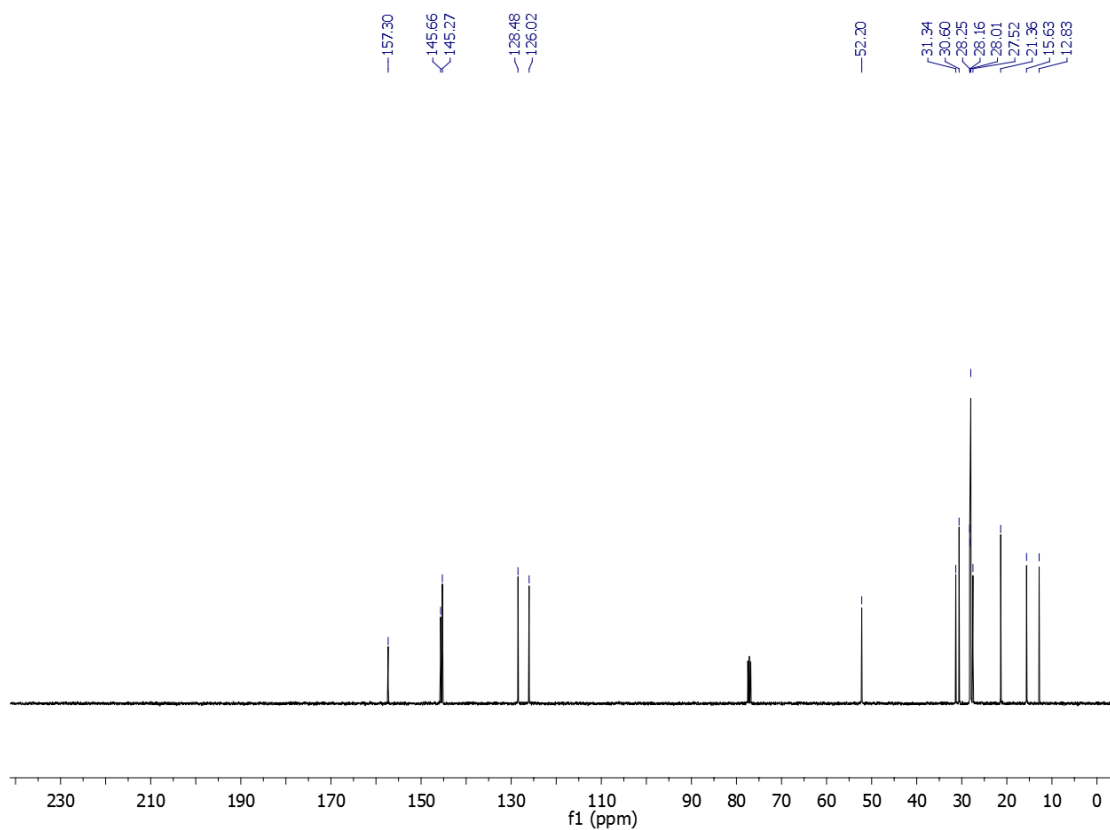

**1,2-Diethylpyridinium bis(trifluoromethanesulfonyl)imide (20).**

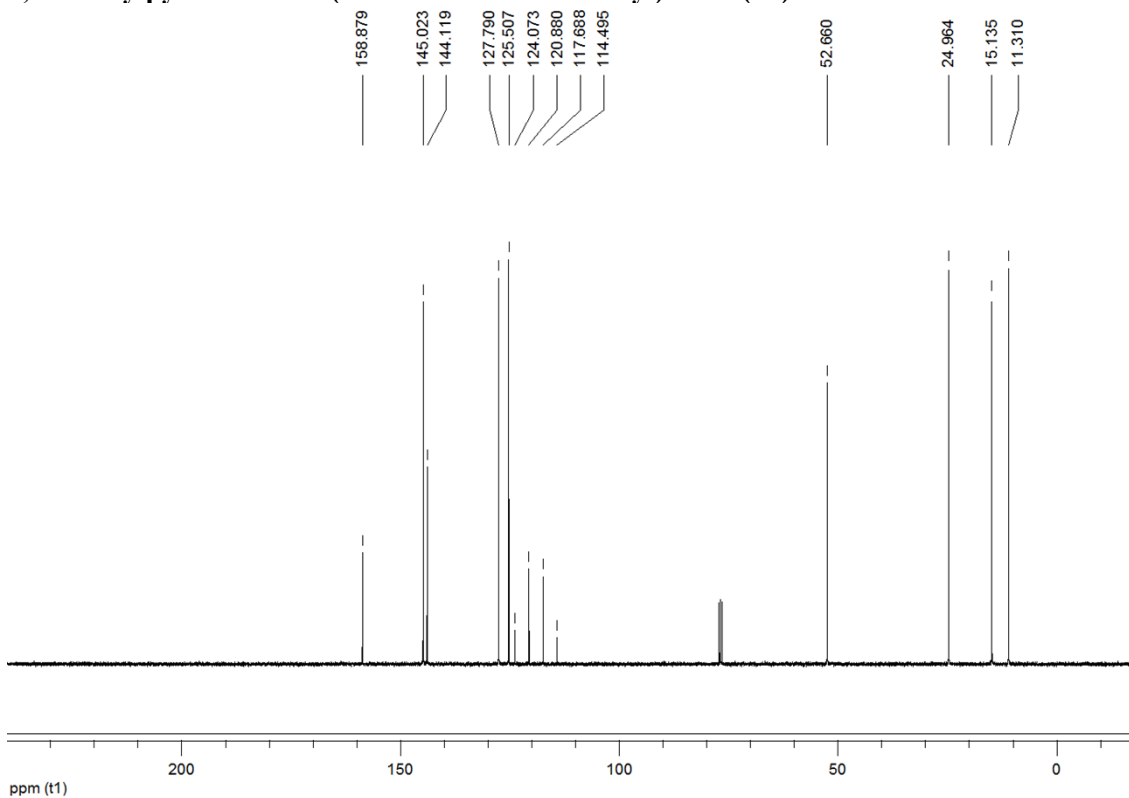

**1-Ethyl-2-propylpyridinium bis(trifluoromethanesulfonyl)imide (21).**

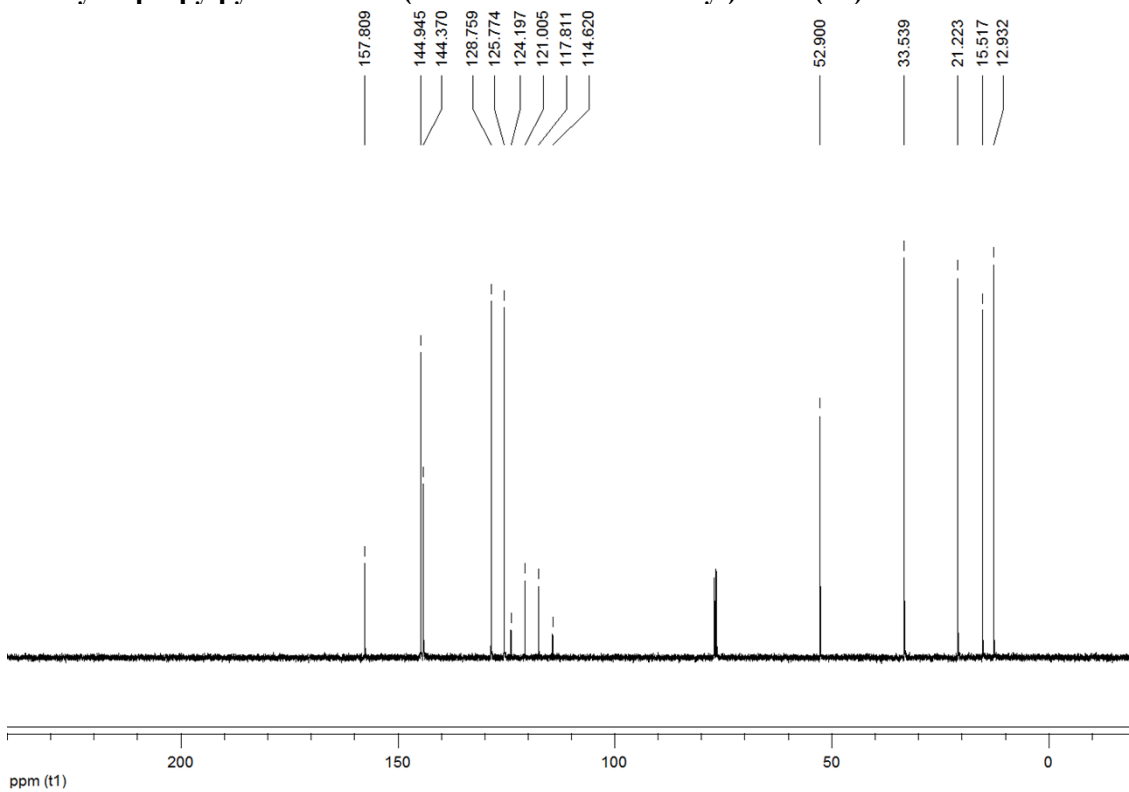



**2-Butyl-1-ethylpyridinium bis(trifluoromethanesulfonyl)imide (22).**

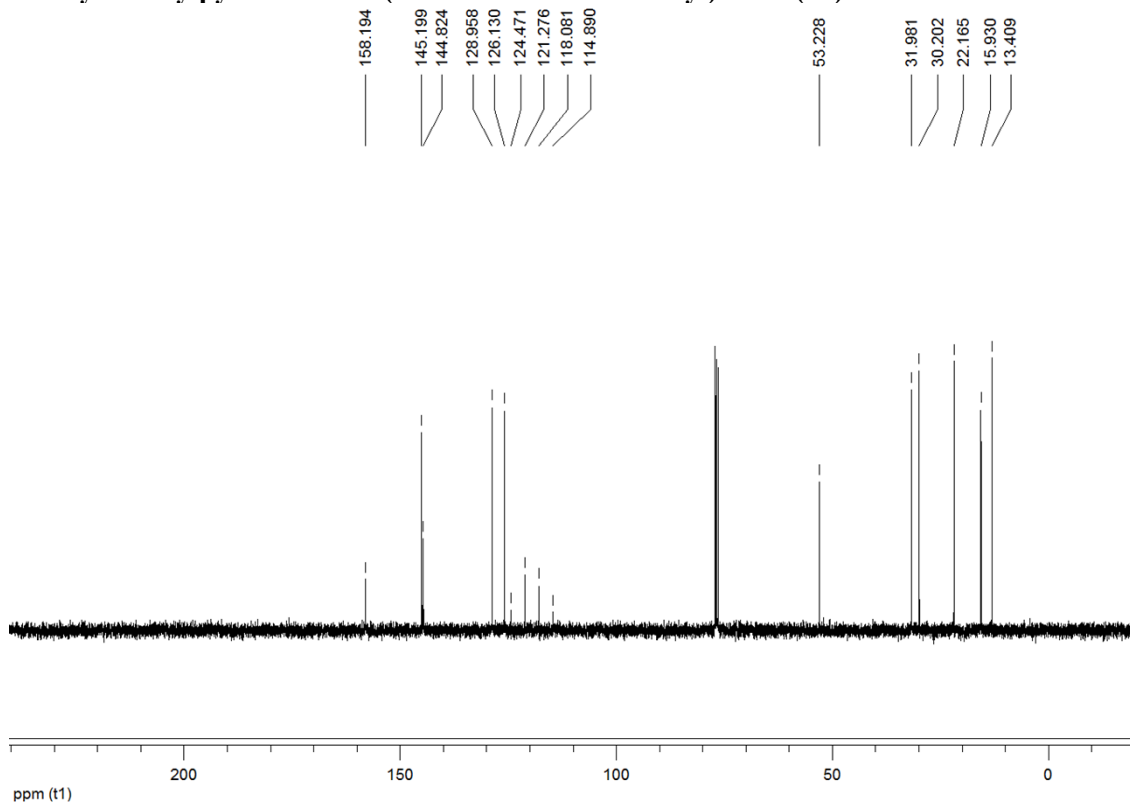

**1-Ethyl-2-pentylpyridinium bis(trifluoromethanesulfonyl)imide (23).**

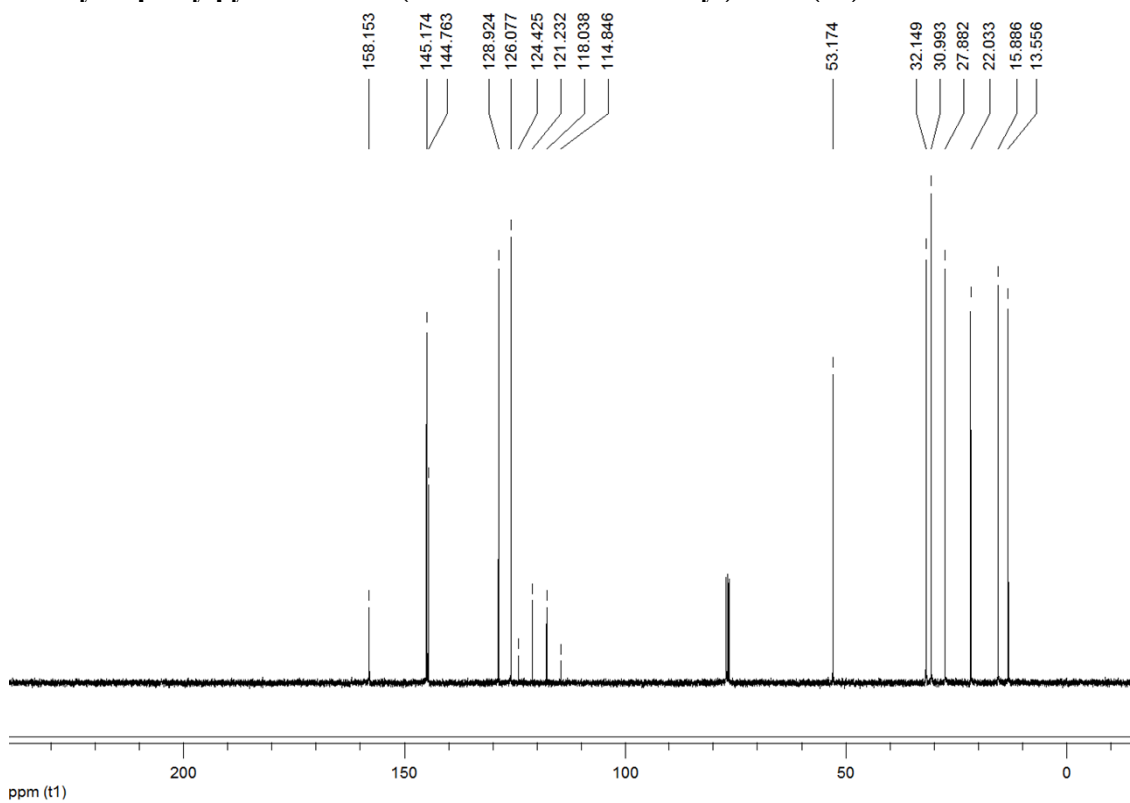

**1-Ethyl-2-hexylpyridinium bis(trifluoromethanesulfonyl)imide (24).**

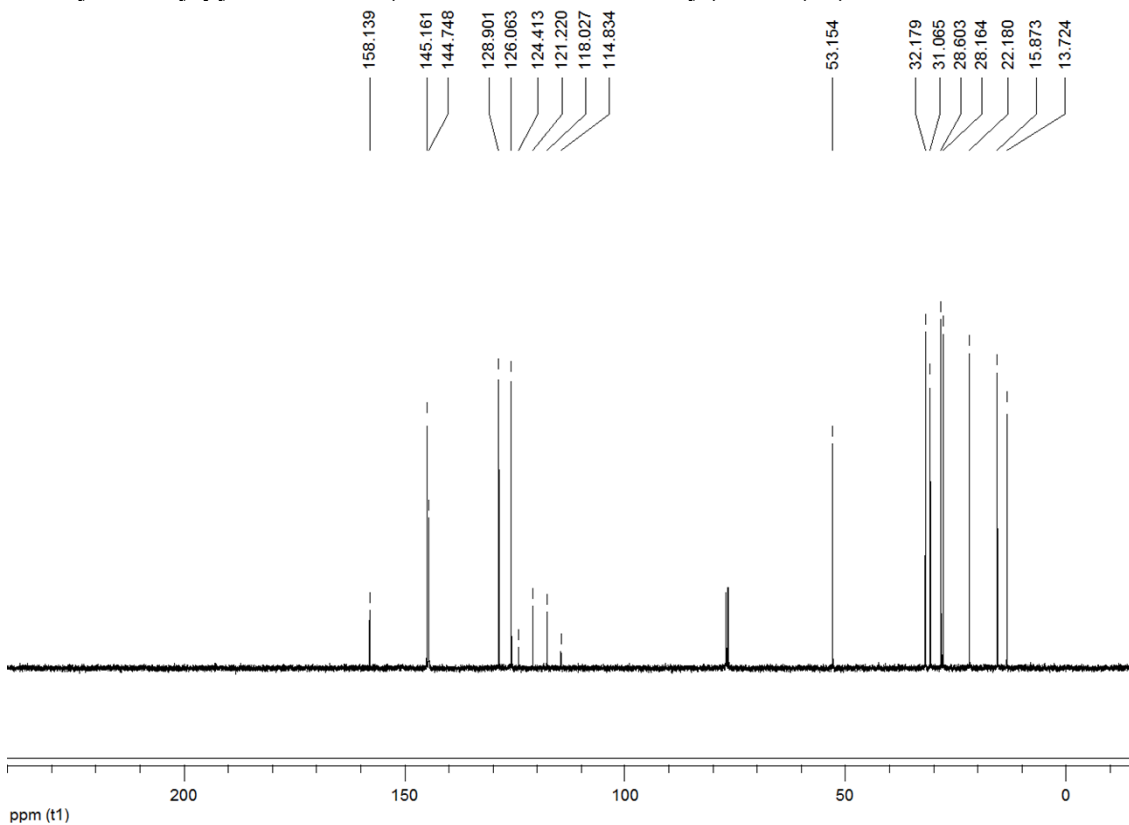

**1-Ethyl-2-heptylpyridinium bis(trifluoromethanesulfonyl)imide (25).**

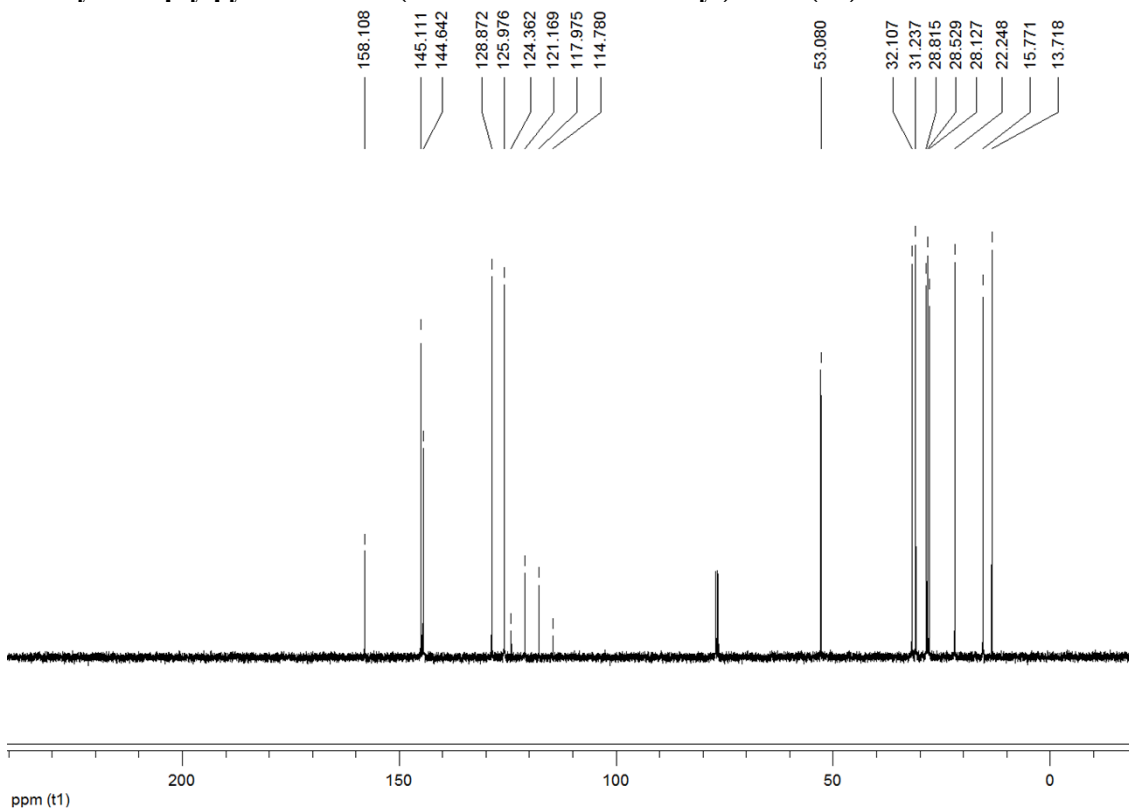

**1-Ethyl-2-octylpyridinium bis(trifluoromethanesulfonyl)imide (26).**

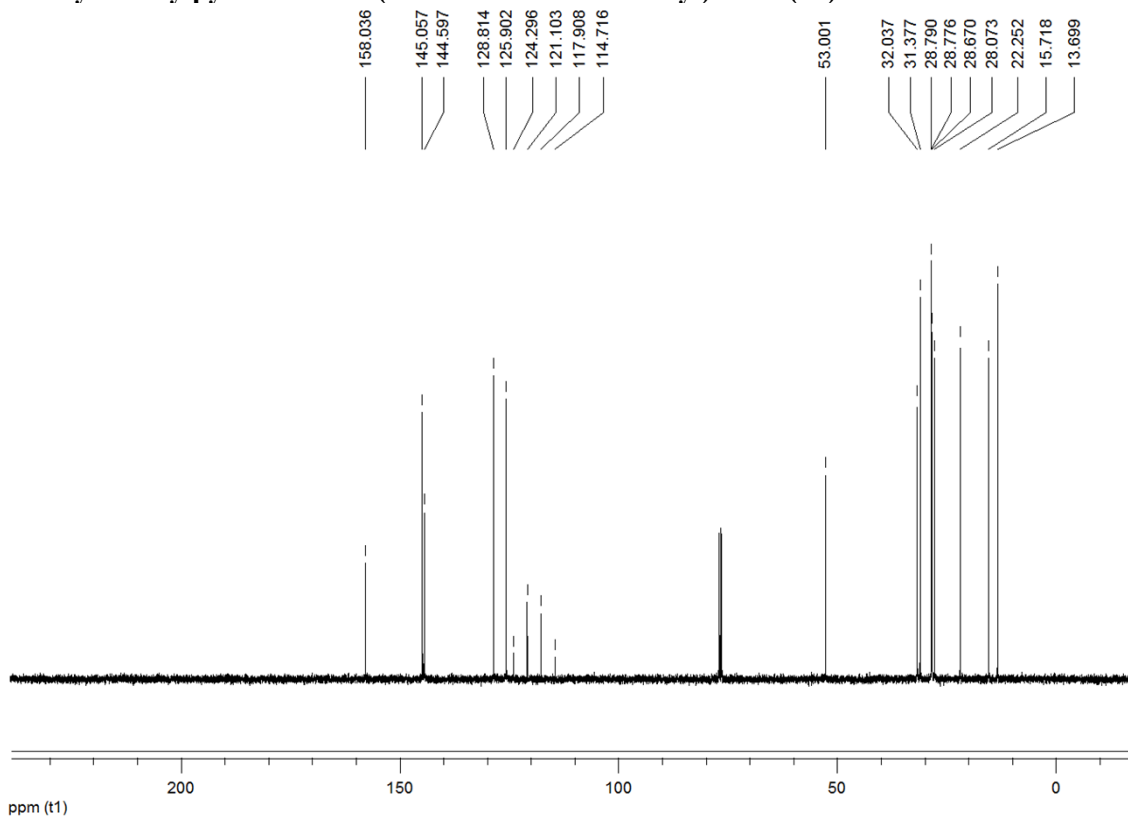

**1-Ethyl-2-nonylpyridinium bis(trifluoromethanesulfonyl)imide (27).**

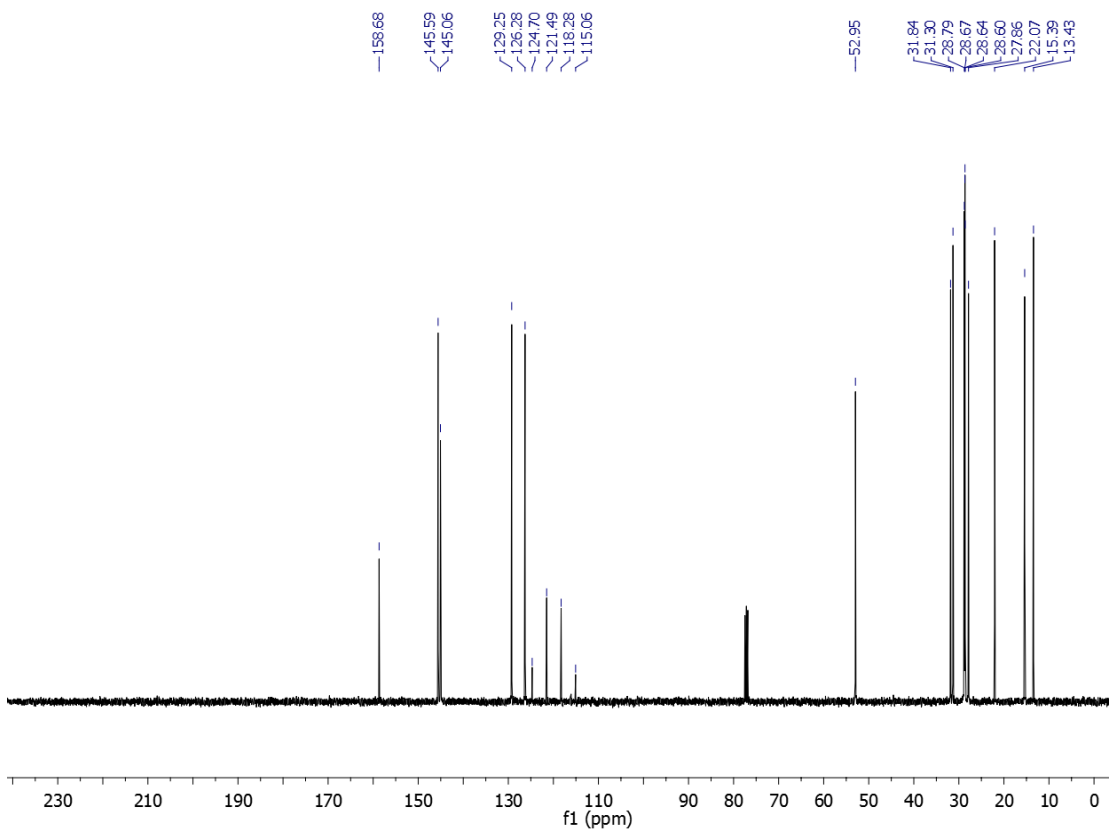

**2-Decyl-1-ethylpyridinium bis(trifluoromethanesulfonyl)imide (28)**

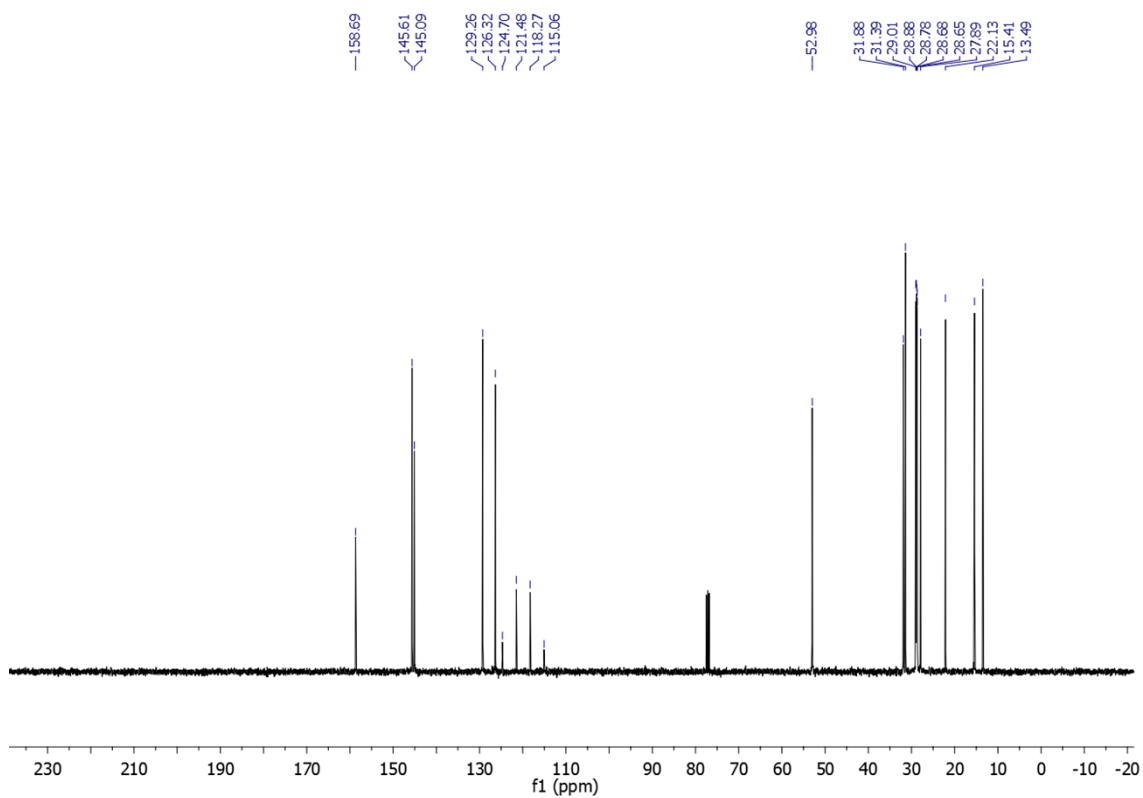

## Volatility of new 1-alkyl-2-ethylpyridinium ionic liquids

**Table S1.** Experimental vapor pressures for the nine pyridinium based ILs, obtained by the quartz crystal microbalance Knudsen effusion apparatus.

| $T / \text{K}$                                                                   | $p / \text{Pa}$ | $\Delta p / \text{Pa}$ | $T / \text{K}$ | $p / \text{Pa}$ | $\Delta p / \text{Pa}$ |
|----------------------------------------------------------------------------------|-----------------|------------------------|----------------|-----------------|------------------------|
| [ <sup>2</sup> C <sub>2</sub> <sup>1</sup> C <sub>2</sub> Py][NTf <sub>2</sub> ] |                 |                        |                |                 |                        |
| 493.11                                                                           | 0.0414          | -0.0083                | 513.10         | 0.1348          | -0.0003                |
| 498.41                                                                           | 0.0560          | 0.0159                 | 518.10         | 0.1784          | -0.0006                |
| 503.11                                                                           | 0.0759          | -0.0058                | 523.10         | 0.2343          | 0.0005                 |
| 508.10                                                                           | 0.1013          | -0.0014                |                |                 |                        |
| [ <sup>2</sup> C <sub>3</sub> <sup>1</sup> C <sub>2</sub> Py][NTf <sub>2</sub> ] |                 |                        |                |                 |                        |
| 498.10                                                                           | 0.0584          | 0.0003                 | 513.08         | 0.1369          | 0.0045                 |
| 503.09                                                                           | 0.0781          | 0.0017                 | 518.08         | 0.1806          | -0.0001                |
| 508.09                                                                           | 0.1047          | -0.0057                | 523.08         | 0.2358          | -0.0006                |
| [ <sup>2</sup> C <sub>4</sub> <sup>1</sup> C <sub>2</sub> Py][NTf <sub>2</sub> ] |                 |                        |                |                 |                        |
| 493.14                                                                           | 0.0461          | -0.0016                | 508.13         | 0.1111          | 0.0003                 |
| 498.14                                                                           | 0.0622          | 0.0000                 | 513.10         | 0.1471          | -0.0018                |
| 503.14                                                                           | 0.0832          | 0.0031                 |                |                 |                        |
| [ <sup>2</sup> C <sub>5</sub> <sup>1</sup> C <sub>2</sub> Py][NTf <sub>2</sub> ] |                 |                        |                |                 |                        |
| 498.13                                                                           | 0.0623          | -0.0034                | 513.13         | 0.1531          | -0.0002                |
| 503.16                                                                           | 0.0846          | 0.0002                 | 518.15         | 0.2020          | 0.0102                 |
| 508.14                                                                           | 0.1139          | 0.0022                 | 523.13         | 0.2723          | -0.0090                |
| [ <sup>2</sup> C <sub>6</sub> <sup>1</sup> C <sub>2</sub> Py][NTf <sub>2</sub> ] |                 |                        |                |                 |                        |
| 493.15                                                                           | 0.0453          | -0.0021                | 508.15         | 0.1145          | -0.0023                |
| 498.16                                                                           | 0.0620          | 0.0009                 | 513.16         | 0.1530          | 0.0025                 |
| 503.17                                                                           | 0.0843          | 0.0030                 | 518.14         | 0.2048          | -0.0021                |
| [ <sup>2</sup> C <sub>7</sub> <sup>1</sup> C <sub>2</sub> Py][NTf <sub>2</sub> ] |                 |                        |                |                 |                        |
| 498.29                                                                           | 0.0505          | -0.0093                | 513.24         | 0.1255          | 0.0058                 |
| 503.25                                                                           | 0.0682          | 0.0046                 | 518.24         | 0.1714          | -0.0102                |
| 508.25                                                                           | 0.0925          | 0.0090                 |                |                 |                        |
| [ <sup>2</sup> C <sub>8</sub> <sup>1</sup> C <sub>2</sub> Py][NTf <sub>2</sub> ] |                 |                        |                |                 |                        |
| 493.42                                                                           | 0.0288          | -0.0076                | 508.06         | 0.0752          | 0.0089                 |
| 498.43                                                                           | 0.0400          | 0.0056                 | 513.03         | 0.1037          | 0.0041                 |
| 503.07                                                                           | 0.0549          | -0.0018                | 518.03         | 0.1434          | -0.0091                |
| [ <sup>2</sup> C <sub>9</sub> <sup>1</sup> C <sub>2</sub> Py][NTf <sub>2</sub> ] |                 |                        |                |                 |                        |
| 508.06                                                                           | 0.0720          | -0.0050                | 528.02         | 0.2488          | 0.0088                 |
| 513.06                                                                           | 0.0988          | 0.0026                 | 533.00         | 0.3353          | 0.0056                 |
| 518.04                                                                           | 0.1362          | -0.0019                | 537.99         | 0.4556          | -0.0107                |
| 523.03                                                                           | 0.1853          | 0.0004                 |                |                 |                        |

| [ <sup>2</sup> C <sub>10</sub> <sup>1</sup> C <sub>2</sub> Py][NTf <sub>2</sub> ] |        |         |        |        |         |
|-----------------------------------------------------------------------------------|--------|---------|--------|--------|---------|
| 508.01                                                                            | 0.0608 | -0.0103 | 523.00 | 0.1606 | 0.0024  |
| 513.01                                                                            | 0.0836 | 0.0068  | 528.00 | 0.2204 | -0.0009 |
| 518.01                                                                            | 0.1162 | 0.0054  | 533.00 | 0.3006 | -0.0048 |

$\Delta p = p - p_{\text{calc}}$ , where  $p_{\text{calc}}$  is calculated from the Clarke and Glew equation (eq. 1) with the parameters given in Table 1.

## Thermodynamic properties of vaporization

The graphic representations of the standard molar enthalpies, entropies and Gibbs energies of vaporization at reference temperature,  $T = 298.15\text{K}$ , as a function of the total number of carbon atoms in the two alkyl side chains of the cation,  $N$ , are presented in figures S1 – S6.

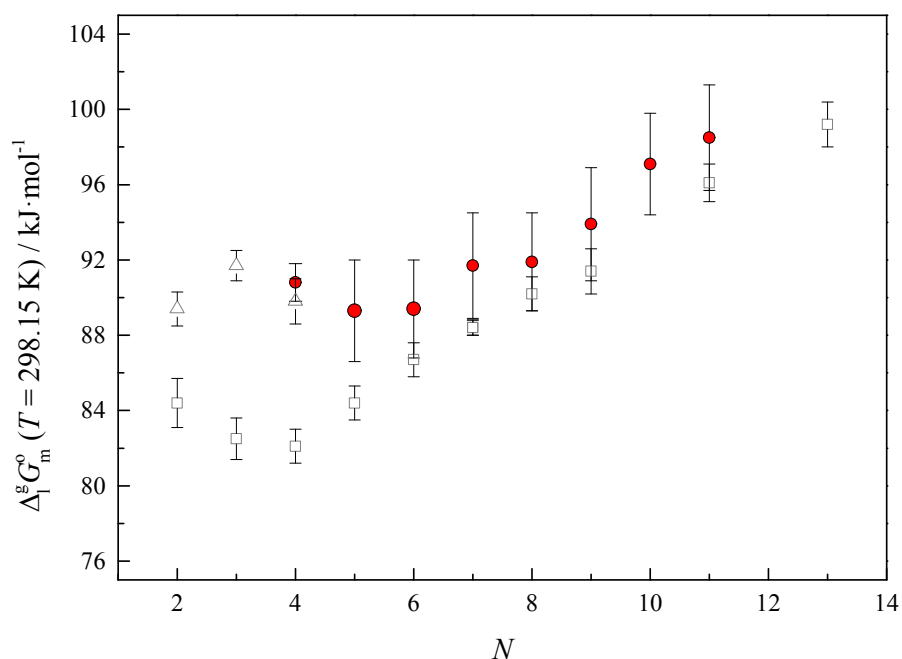

**Figure S1.** Standard ( $p^\circ=10^5$  Pa) molar Gibbs energy of vaporization  $\Delta_1^g G_m^0 (T = 298.15\text{K})$  as a function of the total number of carbons in the alkyl side chains of the cation,  $N$ . ● -  $[\text{C}_{N-1}\text{C}_1\text{im}][\text{NTf}_2]^{1,2}$  ( $N = 2 - 9, 11, 13$ ); □ -  $[\text{C}_N\text{Py}][\text{NTf}_2]^3$  ( $N = 2 - 4$ ); ⊘ -  $[\text{}^2\text{C}_{N-2}\text{}^1\text{C}_2\text{Py}][\text{NTf}_2]$  ( $N = 4 - 10$ ).

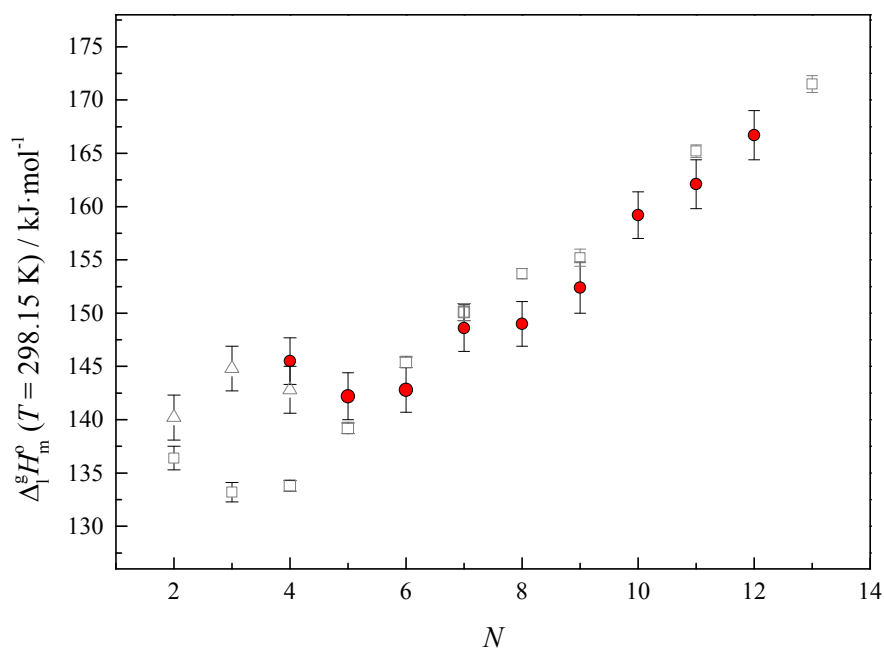

**Figure S2.** Standard ( $p^0=10^5$  Pa) molar enthalpies of vaporization  $\Delta_1^g H_m^0$  ( $T = 298.15$  K) as a function of the total number of carbons in the alkyl side chains of the cation,  $N$ .  $\bullet$  -  $[\text{C}_{N-1}\text{C}_1\text{im}][\text{NTf}_2]^{1,2}$  ( $N = 2 - 9, 11, 13$ );  $\square$  -  $[\text{C}_N\text{Py}][\text{NTf}_2]^3$  ( $N = 2 - 4$ );  $\triangle$  -  $[\text{C}_{N-2}^1\text{C}_2\text{Py}][\text{NTf}_2]$  ( $N = 4 - 10$ ).

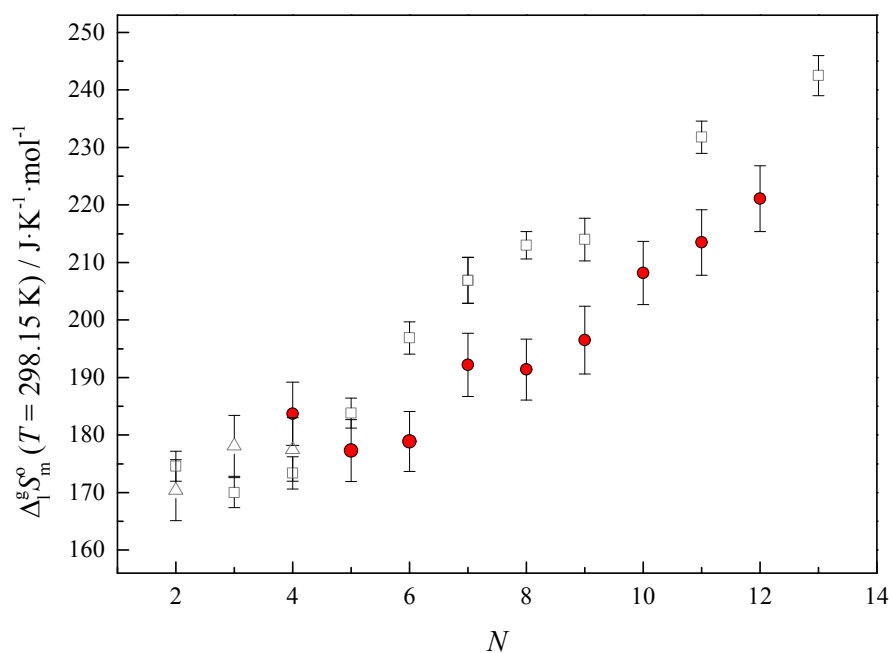

**Figure S3.** Standard ( $p^0=10^5$  Pa) molar entropies of vaporization  $\Delta_1^g S_m^0$  ( $T = 298.15$  K) as a function of the total number of carbons in the alkyl side chains of the cation,  $N$ .  $\bullet$  -  $[\text{C}_{N-1}\text{C}_1\text{im}][\text{NTf}_2]^{1,2}$  ( $N = 2 - 9, 11, 13$ );  $\square$  -  $[\text{C}_N\text{Py}][\text{NTf}_2]^3$  ( $N = 2 - 4$ );  $\triangle$  -  $[\text{C}_{N-2}^1\text{C}_2\text{Py}][\text{NTf}_2]$  ( $N = 4 - 10$ ).

## References

- [1] M. A. A. Rocha, C. F. R. A. C. Lima, L. R. Gomes, B. Schröder, J. A. P. Coutinho, I. M. Marrucho, J. M. S. S. Esperança, L. P. N. Rebelo, K. Shimizu, J. N. Canongia Lopes, L. M. N. B. F. Santos, *J. Phys. Chem. B* **2011**, 115, 10919.
- [2] M. A. A. Rocha, F. M. S. Ribeiro, B. Schröder, J. A. P. Coutinho, L. M. N. B. F. Santos, *J. Chem. Thermodyn.* **2013**, 68, 317.
- [3] M. A. A. Rocha, L. M. N. B. F. Santos, *Chem. Phys. Lett.* **2013**, 585, 59.
